# Supplementary material
Source: publisher figshare collection journal article supplement (https://acs.figshare.com/ndownloader/files/35694260)
Supplement: Supplementary file 1 [file 35694260]

## Supporting Information

# Designing Anion-Derived Solid Electrolyte Interphase in Siloxane-Based Electrolyte for Lithium Metal Batteries

*Jianyang Wu,<sup>a</sup> Tianyi Zhou,<sup>b,c</sup> Bing Zhong,<sup>c</sup> Qian Wang,<sup>\*,d</sup> Wen Liu,<sup>\*,e</sup> and Henghui Zhou<sup>\*,a,f</sup>*

<sup>a</sup> College of Chemistry and Molecular Engineering, Peking University, 100871 Beijing, China

<sup>b</sup> CAS Key Laboratory of Standardization and Measurement for Nanotechnology, CAS Center for Excellence in Nanoscience, National Center for Nanoscience and Technology, Beijing 100190, China

<sup>c</sup> University of Chinese Academy of Sciences, Beijing 100049, China

<sup>d</sup> Institute of Energy Innovation, College of Materials Science and Engineering, Taiyuan University of Technology, Taiyuan 030024, China

<sup>e</sup> State Key Laboratory of Chemical Resource Engineering, College of Chemistry, Beijing University of Chemical Technology, 100092 Beijing, China

<sup>f</sup> Beijing Engineering Research Center of Power Lithium-ion Battery Beijing 102202, China

### **Corresponding Author**

\* E-mail: qianwang19930825@163.com (Q. Wang)

\* E-mail: wenliu@mail.buct.edu.cn (W. Liu).

\* E-mail: hhzhou@pku.edu.cn (H. Zhou).

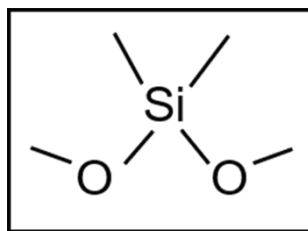

**Figure S1.** The molecular structure of dimethyl dimethoxy silicane (DMSi).

| Electrolytes                                            | Conductivity(mS/cm) at 25 °C |
|---------------------------------------------------------|------------------------------|
| 0.8 M LiFSI+0.2 M LiTFSI+0.05 M LiNO <sub>3</sub> -DMSi | 0.98                         |
| 0.5 M LiFSI+0.5 M LiTFSI+0.05 M LiNO <sub>3</sub> -DMSi | 0.59                         |
| 0.2 M LiFSI+0.8 M LiTFSI+0.05 M LiNO <sub>3</sub> -DMSi | 0.015                        |

**Table S1.** Conductivity data of different electrolytes.

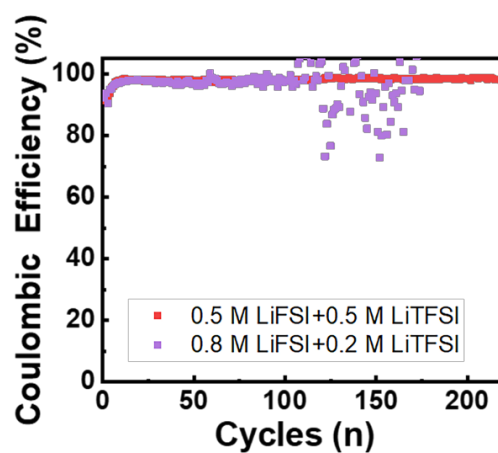

**Figure S2.** The cycling performance of Li||Cu half cells using different electrolytes at 2 mA cm<sup>-2</sup>/2 mAh cm<sup>-2</sup>

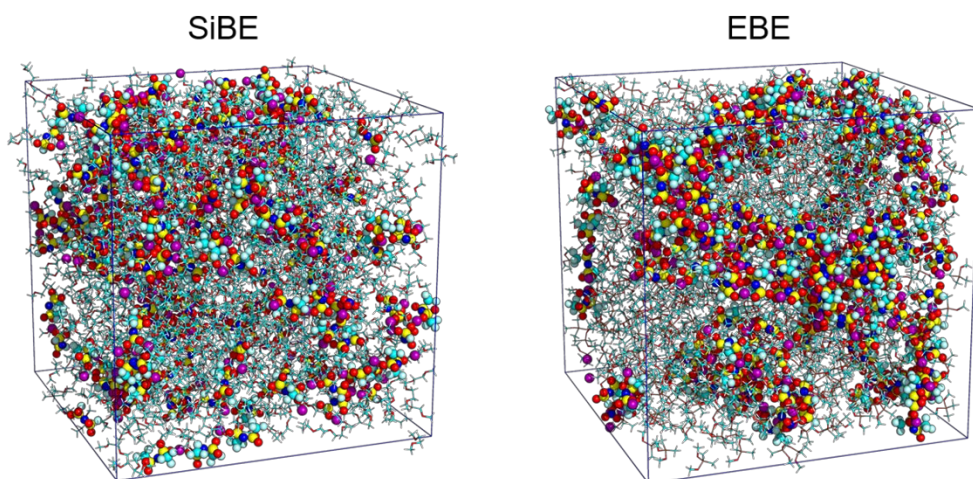

**Figure S3.** Snapshots of the (a) SiBE and the (b) EBE electrolytes obtained by MD simulations.

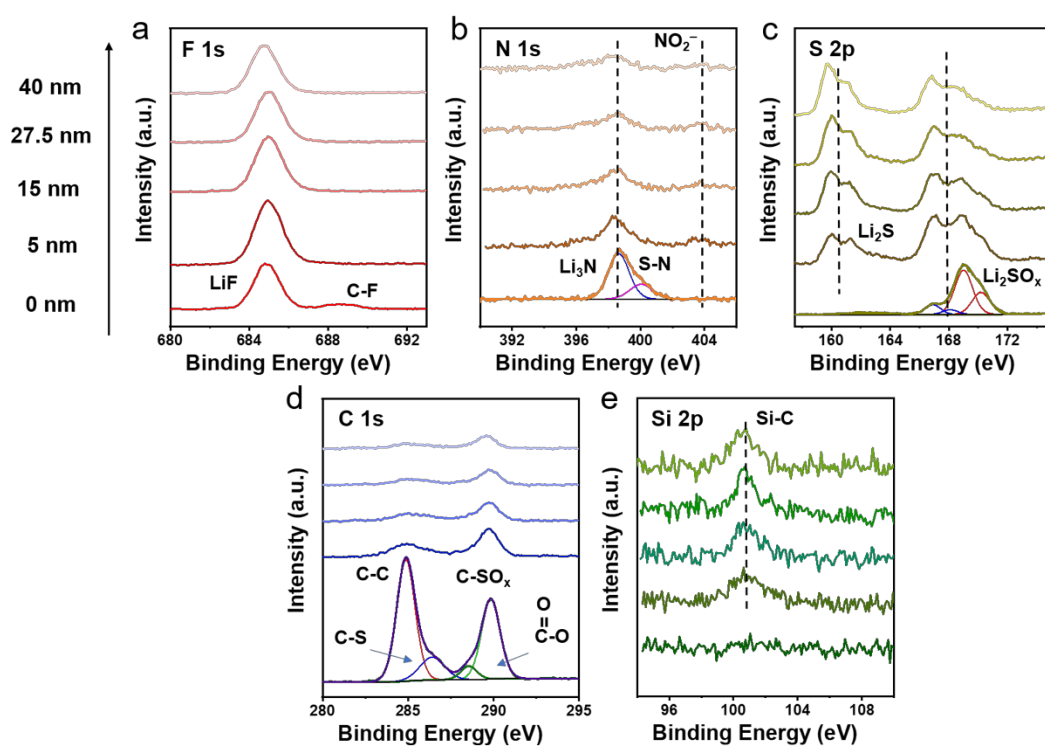

**Figure S4.** XPS characterization of SEI layers. (a) F 1s, (b) N 1s, (c) S 2p, (d) C 1s and (e) Si 2p spectra at different depths of the Li SEI layers in SiBE.

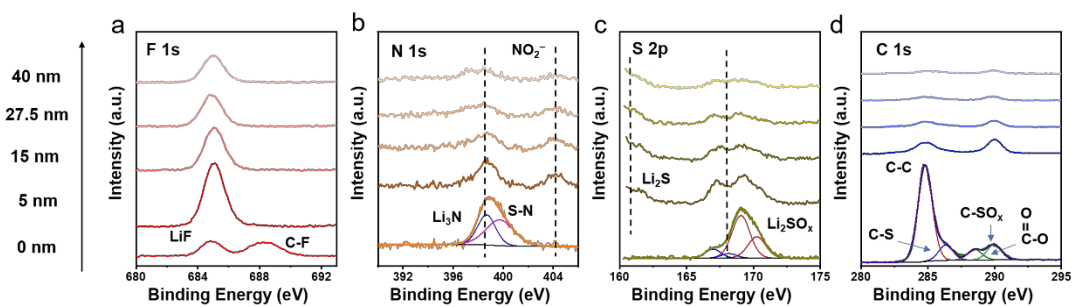

**Figure S5.** XPS characterization of SEI layers. (a) F 1s, (b) N 1s, (c) S 2p and (d) C 1s spectra at different depths of the Li SEI layers in EBE.

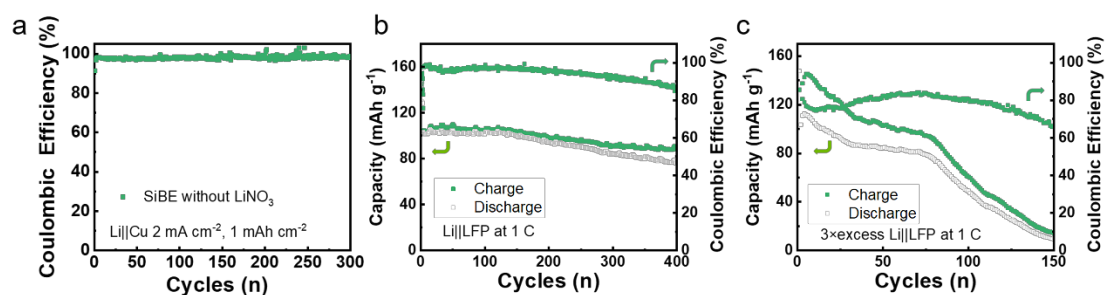

**Figure S6.** Cycling performance of cells using SiBE without LiNO<sub>3</sub>. (a) Li||Cu cells at 2 mA cm<sup>-2</sup>/1 mAh cm<sup>-2</sup>; (b) Li||LFP cells at 1 C. (c) 3×excess Li||LFP cells at 1 C.

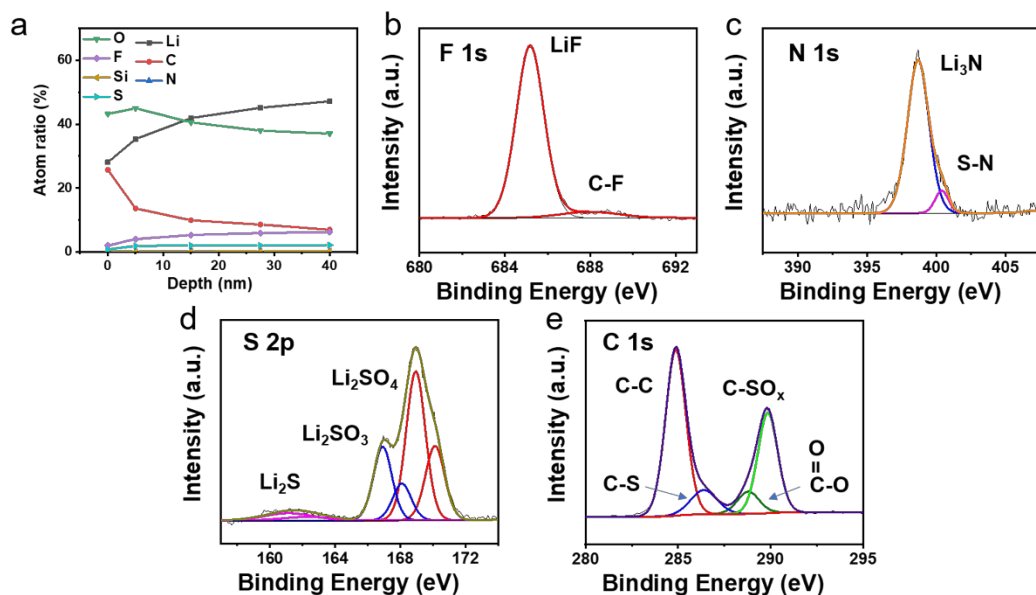

**Figure S7.** XPS characterization of SEI layers in SiBE without LiNO<sub>3</sub>. (a) Elemental distributions of the SEI layers with the depth. (b-e) F 1s, N 1s, S 2p, and C 1s spectra of SEI at 0 nm.

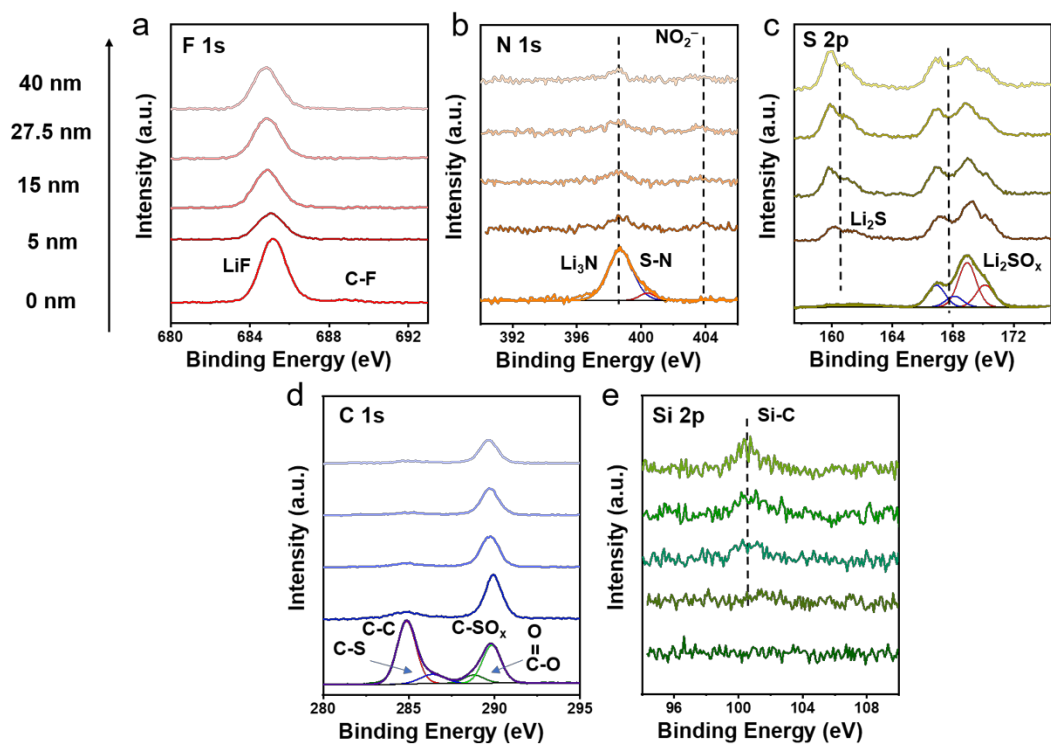

**Figure S8.** XPS characterization of SEI layers. (a) F 1s, (b) N 1s, (c) S 2p, (d) C 1s and (e) Si 2p spectra at different depths of the Li SEI layers in SiBE without LiNO<sub>3</sub>.

|                           | C (%) | N (%) | O (%) | F (%) | S (%) | P (%) | Li (%) | Fe (%) |
|---------------------------|-------|-------|-------|-------|-------|-------|--------|--------|
| Pristine                  | 47.16 | -     | 9.20  | 15.98 | -     | 2.14  | 24.42  | 0.92   |
| SiBE                      | 33.26 | 1.70  | 14.91 | 14.57 | 2.58  | 1.79  | 29.93  | 1.02   |
| SiBE no LiNO <sub>3</sub> | 25.56 | 2.72  | 30.20 | 10.06 | 6.39  | 0.06  | 23.93  | 0.80   |
| EBE                       | 43.16 | 0.73  | 18.04 | 10.02 | 0.72  | 1.35  | 25.03  | 0.95   |

**Table S2.** Elements distributions of CEI layers for LFP cathodes in (a) pristine, (b) SiBE, (c) SiBE without LiNO<sub>3</sub>, and (d) EBE.

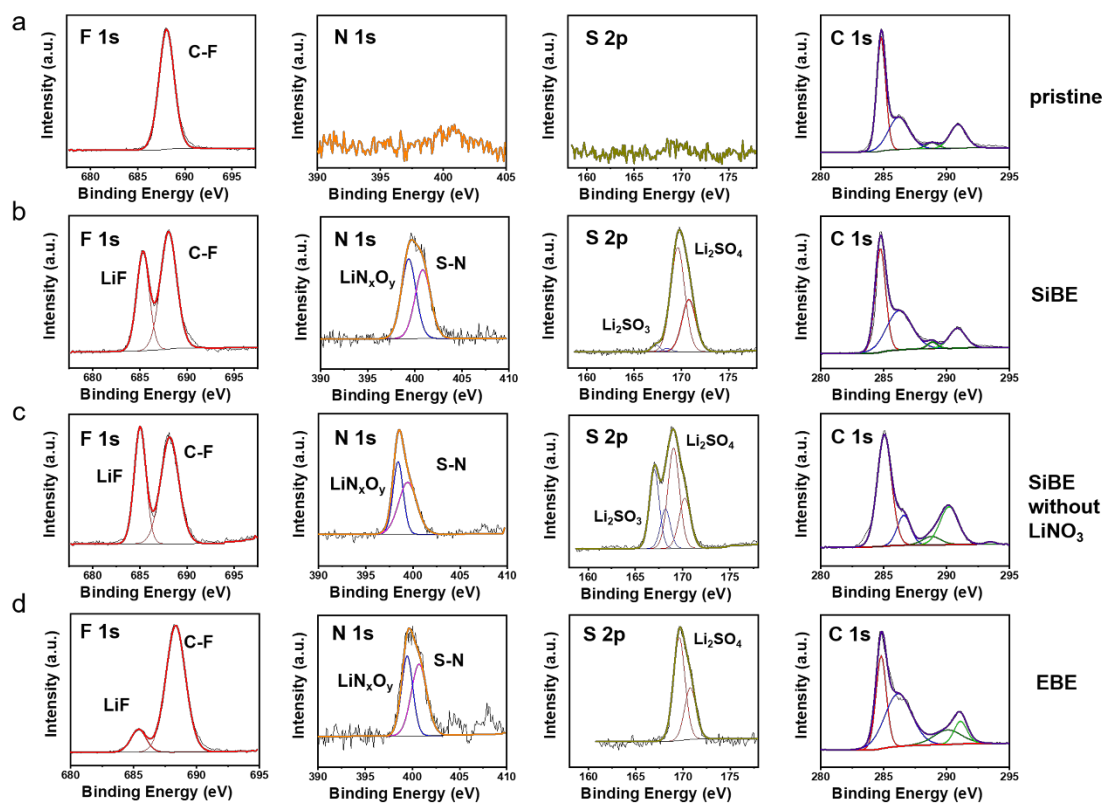

**Figure S9.** XPS characterization of LFP cathodes in (a) pristine, (b) SiBE, (c) SiBE without  $\text{LiNO}_3$ , and (d) EBE.

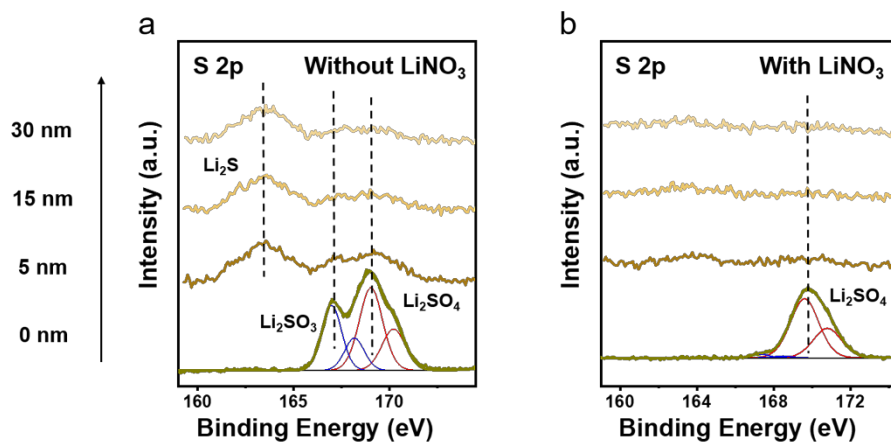

**Figure S10.** XPS characterization of the CEI layers on LFP cathodes at different depths in (a) SiBE without  $\text{LiNO}_3$ , (b) SiBE with  $\text{LiNO}_3$ .

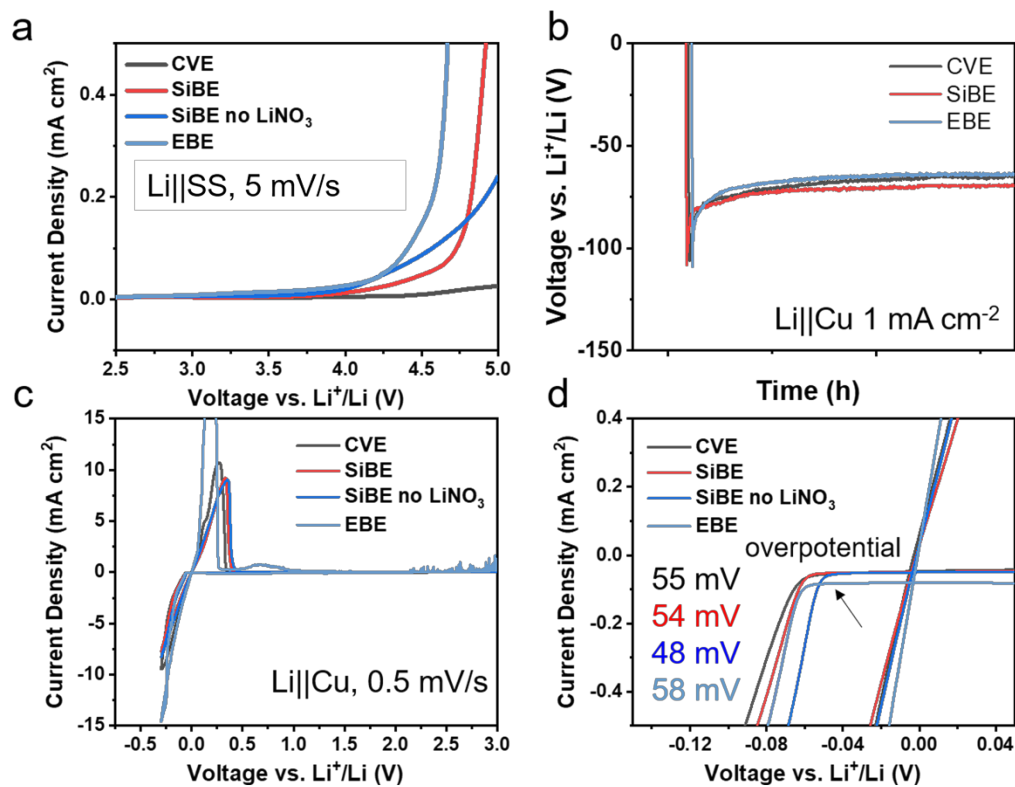

**Figure S11.** Electrochemical tests for different electrolytes. (a) LSV curves of Li||SS at 5 mV/s within the range of 2.5~5 V; (b) Voltage curves of Li||Cu cells at 1 mA cm<sup>-2</sup>; (c) CV curves of Li||Cu cells at 0.5 mV/s within the range of -0.3~3 V; (d) the zoom in view of CV curves.

|      | Nucleation overpotentials<br>(mV) | Growth overpotentials<br>(mV) |
|------|-----------------------------------|-------------------------------|
| SiBE | 35.7                              | 72.5                          |
| CVE  | 40.0                              | 66                            |
| EBE  | 45.2                              | 63.9                          |

**Table S3.** Nucleation overpotentials and growth overpotentials of Li||Cu cells with different electrolytes.



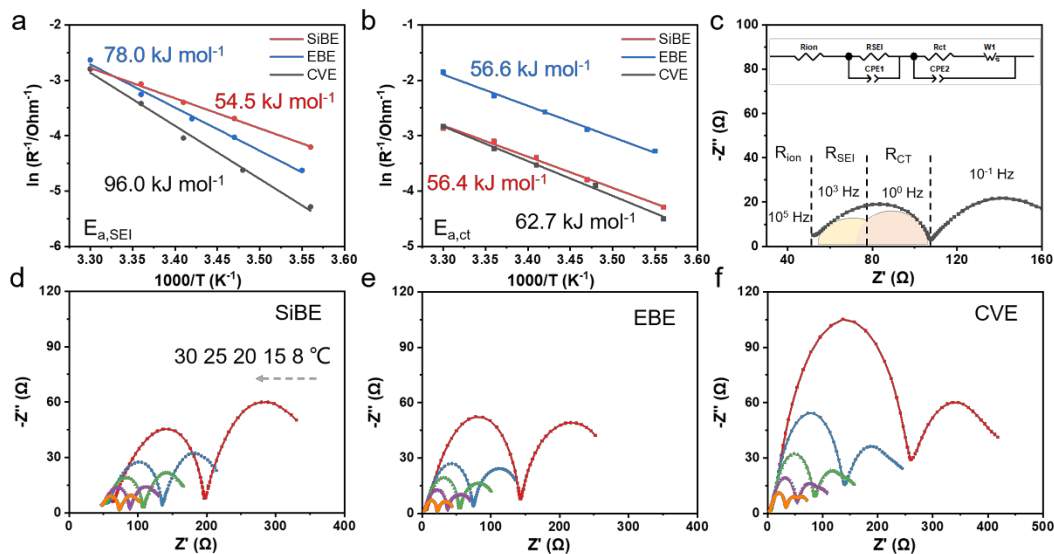

**Figure S12.** The Arrhenius plots of the activation energy  $E_a$  corresponding to (a)  $\text{Li}^+$  diffusion through the SEI layers and (b) desolvation. (c) The equivalent circuit model. The resistance-temperature profiles of Li||Li symmetrical cells using (d) SiBE, (e) EBE, and (f) CVE.

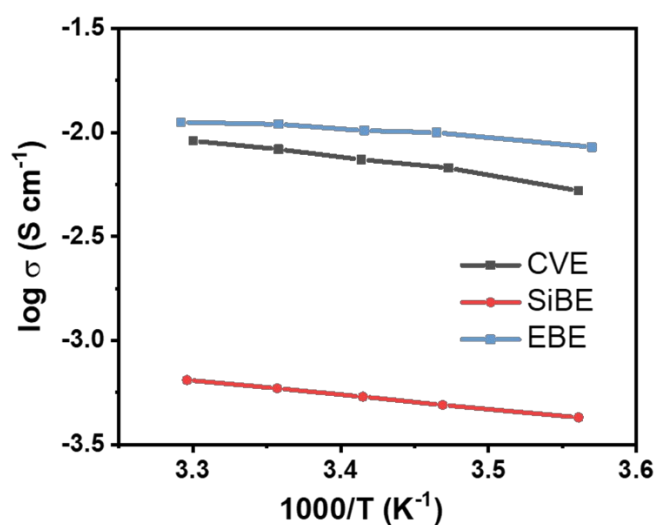

**Figure S13.** Conductivity-temperature curves of SS||SS with different electrolytes.

| Conductivity(mS/cm) | 8°C  | 15°C | 20°C  | 25°C  | 30°C  |
|---------------------|------|------|-------|-------|-------|
| CVE                 | 5.21 | 6.77 | 7.50  | 8.34  | 9.06  |
| SiBE                | 0.43 | 0.49 | 0.53  | 0.59  | 0.65  |
| EBE                 | 8.54 | 9.92 | 10.12 | 10.85 | 11.20 |

**Table S4.** Conductivity-temperature data of SS||SS with different electrolytes.

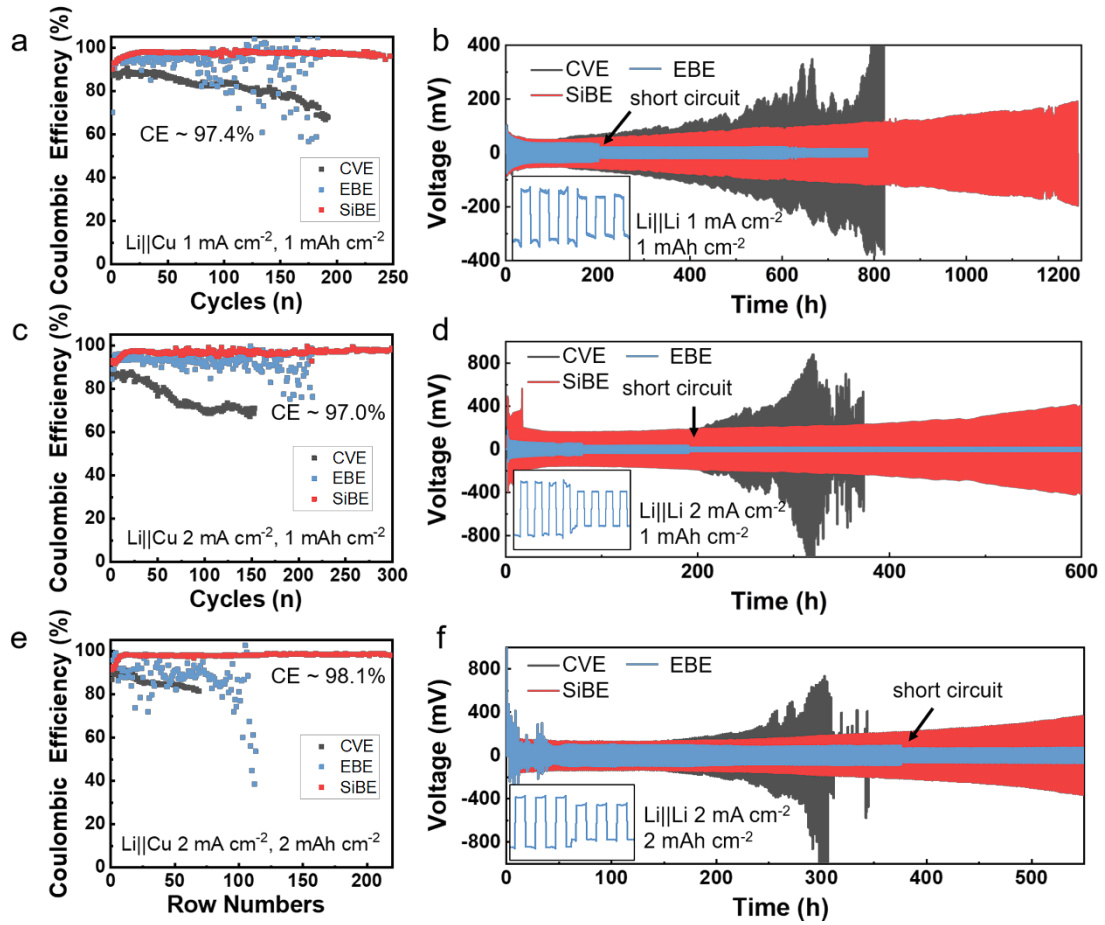

**Figure S14.** Cycling performance of Li-metal cells using CVE, EBE, and SiBE. (a, c, e) The cycling performance of Li||Cu half cells at 1 mA cm<sup>-2</sup>/1 mAh cm<sup>-2</sup>, 2 mA cm<sup>-2</sup>/1 mAh cm<sup>-2</sup> and 2 mA cm<sup>-2</sup>/2 mAh cm<sup>-2</sup>. (b, d, f) The cycling performance of Li||Li symmetrical cells at 1 mA cm<sup>-2</sup>/1 mAh cm<sup>-2</sup>, 2 mA cm<sup>-2</sup>/1 mAh cm<sup>-2</sup> and 2 mA cm<sup>-2</sup>/2 mAh cm<sup>-2</sup>.

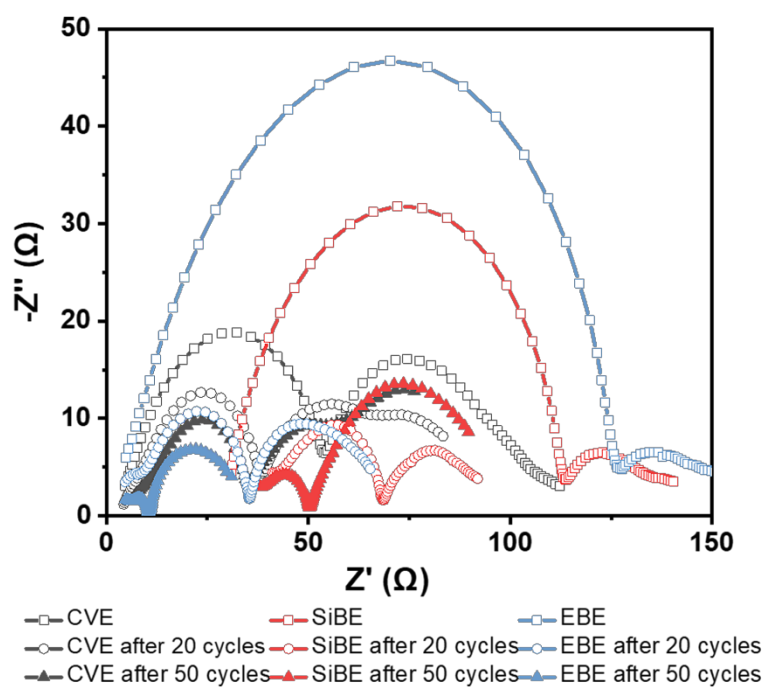

**Figure S15.** EIS curves of Li||Li cells in different electrolytes after cycles.

| Resistance ( $\Omega$ ) | before | 20 cycles | 50 cycles |
|-------------------------|--------|-----------|-----------|
| CVE- $R_{\Omega}$       | 4.7    | 4.3       | 6.6       |
| CVE- $R_{SEI}$          | 47.2   | 27.1      | 25.9      |
| SiBE- $R_{\Omega}$      | 31.0   | 41.2      | 37.6      |
| SiBE- $R_{SEI}$         | 67.2   | 20.5      | 10.0      |
| EBE- $R_{\Omega}$       | 4.8    | 4.7       | 4.7       |
| EBE- $R_{SEI}$          | 115.9  | 27.7      | 4.4       |

**Table S5.** Resistance data of Li||Li cells in different electrolytes after cycles. ( $R_{\Omega}$ : ohmic impedance;  $R_{SEI}$ : the resistance of  $Li^{+}$  transport through SEI)

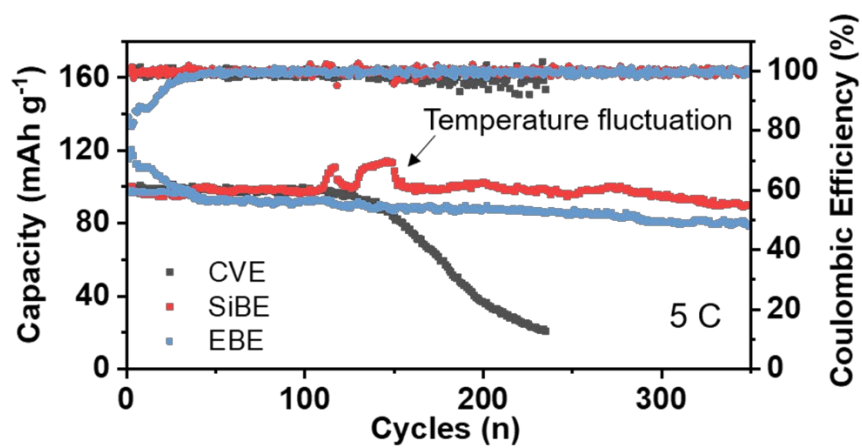

**Figure S16.** Cycling performance of large-excess Li||LFP using various electrolytes at 5 C.
